# Supplementary material for: Risk factors for overweight and obesity, and changes in body mass index of Chinese adults in Shanghai
Source: PubMed Central journal article supplement (PMC2632663; doi:10.1186/1471-2458-8-389), 2008-11-21
Supplement: 1471-2458-8-389-S1.pdf [file 1471-2458-8-389-S1.pdf]

| Variables                | Men (n=2292)                            |                                                                 |                                       | Women (n=3072)                          |                                                                 |                                        |
|--------------------------|-----------------------------------------|-----------------------------------------------------------------|---------------------------------------|-----------------------------------------|-----------------------------------------------------------------|----------------------------------------|
|                          | mean ± SD                               |                                                                 |                                       | mean ± SD                               |                                                                 |                                        |
|                          | BMI < 18.5 kg/m <sup>2</sup><br>(n=128) | 18.5 kg/m <sup>2</sup> ≤ BMI < 25 kg/m <sup>2</sup><br>(n=1411) | BMI ≥ 25 kg/m <sup>2</sup><br>(n=753) | BMI < 18.5 kg/m <sup>2</sup><br>(n=148) | 18.5 kg/m <sup>2</sup> ≤ BMI < 25 kg/m <sup>2</sup><br>(n=1791) | BMI ≥ 25 kg/m <sup>2</sup><br>(n=1133) |
| Age (year)               | 54.7±18.3                               | 54.4±16.3                                                       | 56.5±15.4 <sup>b*</sup>               | 53.6±19.8                               | 51.2±15.1                                                       | 58.0±14.6 <sup>b**</sup>               |
| BMI (kg/m <sup>2</sup> ) | 17.4±1.0 <sup>a**</sup>                 | 22.3±1.7                                                        | 27.2±1.9 <sup>b**</sup>               | 17.4±1.0 <sup>a**</sup>                 | 22.1±1.7                                                        | 27.7±2.4 <sup>b**</sup>                |
| WC (cm)                  | 66.1±5.0 <sup>a**</sup>                 | 79.2±6.7                                                        | 92.0±6.7 <sup>b**</sup>               | 62.7±4.9 <sup>a**</sup>                 | 73.4±6.6                                                        | 87.4±7.9 <sup>b**</sup>                |
| WHR                      | 0.80±0.06 <sup>a**</sup>                | 0.87±0.06                                                       | 0.94±0.06 <sup>b**</sup>              | 0.76±0.06 <sup>a**</sup>                | 0.82±0.07                                                       | 0.89±0.07 <sup>b**</sup>               |
| WHtR                     | 0.39±0.03 <sup>a**</sup>                | 0.47±0.04                                                       | 0.55±0.04 <sup>b**</sup>              | 0.40±0.04 <sup>a**</sup>                | 0.47±0.05                                                       | 0.56±0.06 <sup>b**</sup>               |
| BF%                      | 13.2±3.7 <sup>a**</sup>                 | 21.6±4.9                                                        | 28.4±5.0 <sup>b**</sup>               | 19.86±3.2 <sup>a**</sup>                | 30.3.4±4.5                                                      | 40.5±5.5 <sup>b**</sup>                |
| SBP(mmHg)                | 117.3±16.5 <sup>a**</sup>               | 125.7±19.1                                                      | 133.8±19.4 <sup>b**</sup>             | 117.1±20.9 <sup>a*</sup>                | 121.3±20.2                                                      | 132.0±21.3 <sup>b**</sup>              |
| DBP(mmHg)                | 73.7±7.7 <sup>a**</sup>                 | 79.5±10.2                                                       | 85.3±11.2 <sup>b**</sup>              | 73.0±9.4 <sup>a**</sup>                 | 76.3±9.7                                                        | 81.48±10.9 <sup>b**</sup>              |
| TG(mmol/l)               | 1.17±0.58 <sup>a**</sup>                | 1.78±1.21                                                       | 2.37±1.95 <sup>b**</sup>              | 1.29±0.59 <sup>a*</sup>                 | 1.60±0.96                                                       | 2.10±1.35 <sup>b**</sup>               |
| TC(mmol/l)               | 4.46±0.94 <sup>a**</sup>                | 4.87±1.04                                                       | 5.08±1.15 <sup>b**</sup>              | 4.98±1.29                               | 5.00±1.16                                                       | 5.33±1.19 <sup>b**</sup>               |
| HDL-C (mmol/l)           | 1.34±0.27 <sup>a*</sup>                 | 1.28±0.28                                                       | 1.24±0.28 <sup>b*</sup>               | 1.45±0.27 <sup>a**</sup>                | 1.36±0.29                                                       | 1.31±0.29 <sup>b**</sup>               |
| LDL-C (mmol/l)           | 2.96±0.79 <sup>a**</sup>                | 3.35±0.91                                                       | 3.55±0.99 <sup>b**</sup>              | 3.38±1.15                               | 3.40±1.01                                                       | 3.72±1.04 <sup>b**</sup>               |
| FPG (mmol/l)             | 4.86±0.71 <sup>a*</sup>                 | 5.23±1.53                                                       | 5.61±1.56 <sup>b**</sup>              | 4.89±0.86 <sup>a*</sup>                 | 5.16±1.31                                                       | 5.64±1.51 <sup>b**</sup>               |
| FINS (mU/l)              | 5.46±4.21 <sup>a**</sup>                | 7.21±4.39                                                       | 10.63±6.14 <sup>b**</sup>             | 6.90±4.50                               | 7.66±5.13                                                       | 10.68±6.21 <sup>b**</sup>              |
