# Supplementary material for: Risk factors for overweight and obesity, and changes in body mass index of Chinese adults in Shanghai
Source: PubMed Central journal article supplement (PMC2632663; doi:10.1186/1471-2458-8-389), 2008-11-21
Supplement: 1471-2458-8-389-S2.pdf [file 1471-2458-8-389-S2.pdf]

| Population                | N    | Chinese BMI cut-offs standard                |                         | WHO BMI cut-offs standard                    |                         |                         |
|---------------------------|------|----------------------------------------------|-------------------------|----------------------------------------------|-------------------------|-------------------------|
|                           |      | 24kg/m <sup>2</sup> ≤BMI<28kg/m <sup>2</sup> | BMI≥28kg/m <sup>2</sup> | 25kg/m <sup>2</sup> ≤BMI<30kg/m <sup>2</sup> | BMI≥30kg/m <sup>2</sup> | BMI≥25kg/m <sup>2</sup> |
|                           |      | Mean±SD (%)                                  | Mean±SD (%)             | Mean±SD (%)                                  | Mean±SD (%)             | adjusted OR(95%CI)      |
| <b>Men</b>                |      |                                              |                         |                                              |                         |                         |
| 25-34y                    | 215  | 25.8±1.1(32.6)                               | 30.4±2.1(8.8)           | 26.9±1.3(27.4)                               | 32.7±1.9(3.3)           | 1                       |
| 35-44y                    | 563  | 25.6±1.1(31.1)                               | 29.9±1.7(6.0)           | 26.8±1.3(22.7)                               | 31.5±1.8(2.3)           | 0.56(0.37-0.85)         |
| 45-54y                    | 412  | 25.7±1.1(39.8)                               | 29.6±1.4(8.7)           | 26.8±1.3(33.0)                               | 31.4±1.1(2.4)           | 0.89(0.59-1.35)         |
| 55-64y                    | 280  | 25.8±1.1(37.1)                               | 30.2±1.5(8.9)           | 26.6±1.2(30.7)                               | 31.5±0.8(4.6)           | 0.90(0.58-1.40)         |
| 65-74y                    | 472  | 25.8±1.1(43.4)                               | 29.8±1.7(10.6)          | 26.7±1.3(38.8)                               | 31.9±1.4(3.4)           | 1.32(0.88-1.98)         |
| 75-95y                    | 350  | 25.8±1.2(30.6)                               | 29.4±1.6(8.9)           | 27.0±1.3(27.4)                               | 32.0±2.1(1.7)           | 0.76(0.50-1.18)         |
| Crude                     | 2292 | 25.7±1.1(36.0)                               | 29.8±1.7(8.5)           | 26.8±1.3(30.0)                               | 31.7±1.5(2.8)           |                         |
| Standardized <sup>a</sup> |      | 25.7(34.9)                                   | 30.0(8.3)               | 26.8(28.6)                                   | 31.9(3.0)               |                         |
| <b>Women</b>              |      |                                              |                         |                                              |                         |                         |
| 25-34y                    | 226  | 25.5±1.1(23.5)                               | 30.4±1.6(3.5)           | 26.5±1.3(16.8)                               | 31.4±1.5(1.8)           | 1                       |
| 35-44y                    | 898  | 25.8±1.1(25.4)                               | 30.1±2.2(8.5)           | 26.9±1.3(22.2)                               | 31.9±2.3(3.6)           | 1.14(0.72-1.81)         |
| 45-54y                    | 633  | 25.8±1.1(31.6)                               | 29.8±1.9(12.8)          | 26.9±1.3(30.5)                               | 31.6±2.1(4.9)           | 1.53(0.96-2.44)         |
| 55-64y                    | 346  | 25.8±1.1(43.1)                               | 30.8±2.3(18.5)          | 27.0±1.4(39.0)                               | 32.4±2.1(9.8)           | 2.85(1.76-4.63)         |
| 65-74y                    | 585  | 26.0±1.1(43.6)                               | 30.6±2.6(17.6)          | 26.9±1.3(43.2)                               | 32.7±2.4(8.4)           | 3.06(1.91-4.91)         |
| 75-94y                    | 384  | 26.0±1.1(34.4)                               | 30.3±2.1(16.7)          | 27.1±1.4(36.2)                               | 32.2±1.9(6.8)           | 2.44(1.49-4.00)         |
| Crude                     | 3072 | 25.8±1.1(33.1)                               | 30.3±2.3(12.9)          | 26.9±1.3(31.2)                               | 32.2±2.2(5.7)           |                         |
| Standardized <sup>a</sup> |      | 25.7(29.9)                                   | 30.3(10.0)              | 26.8(26.3)                                   | 31.8(4.5)               |                         |
| <b>Total subjects</b>     |      |                                              |                         |                                              |                         |                         |
| Crude                     | 5364 | 25.8±1.1(34.3)                               | 30.2±1.7(11.0)          | 26.9±1.3(30.7)                               | 32.1±2.0(4.5)           |                         |
| Standardized <sup>a</sup> |      | 25.7(32.4)                                   | 30.1(9.1)               | 26.8(27.5)                                   | 31.9(3.7)               |                         |
