# Supplementary material for: Risk factors for overweight and obesity, and changes in body mass index of Chinese adults in Shanghai
Source: PubMed Central journal article supplement (PMC2632663; doi:10.1186/1471-2458-8-389), 2008-11-21
Supplement: 1471-2458-8-389-S3.pdf [file 1471-2458-8-389-S3.pdf]

| Variables                      | Men (N=2164) |              |                                   |                                 | Women (N=2924) |              |                                   |                                |
|--------------------------------|--------------|--------------|-----------------------------------|---------------------------------|----------------|--------------|-----------------------------------|--------------------------------|
|                                | Control      | Case         | Crude                             | Adjusted                        | Control        | Case         | Crude                             | Adjusted                       |
|                                | (N=1411)     | (N=753)      | OR (95% C.I.)                     | OR (95% C.I.)                   | (N=1791)       | (N=1133)     | OR (95% C.I.)                     | OR (95% C.I.)                  |
|                                | <i>n</i> (%) | <i>n</i> (%) |                                   |                                 | <i>n</i> (%)   | <i>n</i> (%) |                                   |                                |
| Monthly household income (RMB) |              |              |                                   |                                 |                |              |                                   |                                |
| <1,000 yuan                    | 251(19.2)    | 128(18.2)    | 1(Ref.)                           |                                 | 334(20.7)      | 260(24.1)    | 1(Ref.)                           |                                |
| 1,100yuan-2,000 yuan           | 532(40.8)    | 291(41.3)    | 1.07 (0.82 - 1.38)                |                                 | 680(42.1)      | 484(44.9)    | 0.93 (0.76 - 1.13)                |                                |
| 2,100yuan-3,000 yuan           | 289(22.1)    | 147(20.9)    | 1.00 (0.74 - 1.33)                |                                 | 361(22.3)      | 213(19.7)    | 0.76 (0.60 - 0.97) <sup>a*</sup>  |                                |
| >3,000 yuan                    | 233(17.9)    | 139(19.7)    | 1.16 (0.86 - 1.57)                |                                 | 241(14.9)      | 122(11.3)    | 0.65 (0.50 - 0.85) <sup>a*</sup>  |                                |
| Education                      |              |              |                                   |                                 |                |              |                                   |                                |
| Low                            | 570(43.6)    | 349(49.7)    | 1(Ref.)                           |                                 | 891(55.4)      | 786(73.1)    | 1(Ref.)                           | 1(Ref.)                        |
| Medium                         | 447(34.2)    | 206(29.3)    | 0.75 (0.61 - 0.93) <sup>a*</sup>  |                                 | 544(33.8)      | 224(20.8)    | 0.47 (0.39 - 0.56) <sup>a**</sup> | 0.64(0.52-0.79) <sup>a**</sup> |
| High                           | 289(22.1)    | 147(20.9)    | 0.83 (0.65 - 1.05)                |                                 | 173(10.8)      | 65(6.0)      | 0.43 (0.31 - 0.58) <sup>a**</sup> | 0.50(0.36-0.68) <sup>a**</sup> |
| Smoking                        |              |              |                                   |                                 |                |              |                                   |                                |
| Nonsmoker                      | 517(39.6)    | 316(44.9)    | 1(Ref.)                           | 1(Ref.)                         | 1558(96.8)     | 1028(95.4)   | 1(Ref.)                           |                                |
| Current smoker                 | 656(50.2)    | 312(44.3)    | 0.78 (0.65 - 0.95) <sup>a*</sup>  | 0.76(0.61-0.95) <sup>a*</sup>   | 47(2.9)        | 42(3.9)      | 1.34 (0.88 - 2.05)                |                                |
| Exsmoker                       | 134(10.3)    | 76(10.8)     | 0.93 (0.68 - 1.27)                | 0.83(0.60-1.15)                 | 5(0.3)         | 8(0.7)       | 2.40 (0.78 - 7.37)                |                                |
| Alcohol intake                 |              |              |                                   |                                 |                |              |                                   |                                |
| Nondrinker                     | 971(74.1)    | 491(69.6)    | 1(Ref.)                           | 1(Ref.)                         | 1583(98.0)     | 1061(98.3)   | 1(Ref.)                           |                                |
| Current drinker                | 336(25.6)    | 212(30.1)    | 1.25 (1.02 - 1.53) <sup>a*</sup>  | 1.42(1.14 - 1.77) <sup>a*</sup> | 28(1.7)        | 18(1.7)      | 0.95 (0.52 - 1.73)                |                                |
| Exdrinker                      | 3(0.2)       | 2(0.3)       | 1.31 (0.22 - 7.89)                | 1.67(0.27-10.47)                | 4(0.2)         | 0            | 0.00                              |                                |
| Family history of obesity      |              |              |                                   |                                 |                |              |                                   |                                |
| No                             | 1185(90.6)   | 585(83.2)    | 1(Ref.)                           | 1(Ref.)                         | 1443(89.5)     | 897(83.3)    | 1(Ref.)                           | 1(Ref.)                        |
| Yes                            | 123(9.4)     | 118(16.8)    | 1.95 (1.49 - 2.56) <sup>a**</sup> | 2.20(1.66-2.92) <sup>a**</sup>  | 169(10.5)      | 180(16.7)    | 1.71 (1.36 - 2.14) <sup>a**</sup> | 2.25(1.77-2.86) <sup>a**</sup> |
