# Supplementary material for: Risk factors for overweight and obesity, and changes in body mass index of Chinese adults in Shanghai
Source: PubMed Central journal article supplement (PMC2632663; doi:10.1186/1471-2458-8-389), 2008-11-21
Supplement: 1471-2458-8-389-S4.pdf [file 1471-2458-8-389-S4.pdf]

| Metabolic diseases/disorders | BMI < 18.5kg/m <sup>2</sup><br>(N=276) |                                | 18.5kg/m <sup>2</sup> ≤ BMI < 25kg/m <sup>2</sup><br>(N=3202) |           | 25kg/m <sup>2</sup> ≤ BMI < 30kg/m <sup>2</sup><br>(N=1645) |                                | BMI ≥ 30kg/m <sup>2</sup><br>(N=241) |                                |
|------------------------------|----------------------------------------|--------------------------------|---------------------------------------------------------------|-----------|-------------------------------------------------------------|--------------------------------|--------------------------------------|--------------------------------|
|                              | <i>n</i> (%)                           | adjusted OR (95% CI)           | <i>n</i> (%)                                                  | OR (ref.) | <i>n</i> (%)                                                | adjusted OR (95% CI)           | <i>n</i> (%)                         | adjusted OR (95% CI)           |
| DM                           | 16(5.9)                                | 0.54 (0.32-0.92) <sup>a*</sup> | 276(8.7)                                                      | 1         | 288(17.6)                                                   | 1.93(1.61-2.31) <sup>a**</sup> | 57(23.8)                             | 2.84(2.03-3.96) <sup>a**</sup> |
| Hypertension                 | 52(18.8)                               | 0.34(0.24-0.48) <sup>a**</sup> | 1039(32.4)                                                    | 1         | 893(54.3)                                                   | 2.19(1.92-2.50) <sup>a**</sup> | 168(69.7)                            | 4.45(3.29-6.03) <sup>a**</sup> |
| high TG                      | 50(18.1)                               | 0.34(0.25-0.47) <sup>a**</sup> | 1229(38.4)                                                    | 1         | 976(59.3)                                                   | 2.27(2.00-2.56) <sup>a**</sup> | 147(61.0)                            | 2.41(1.84-3.16) <sup>a**</sup> |
| high TC                      | 89(32.2)                               | 0.77(0.59-1.02)                | 1150(35.9)                                                    | 1         | 812(49.4)                                                   | 1.56(1.37-1.76) <sup>a**</sup> | 114(47.3)                            | 1.39(1.07-1.82) <sup>a*</sup>  |
| low HDL-C                    | 51(18.5)                               | 0.60(0.44-0.82) <sup>a*</sup>  | 887(27.7)                                                     | 1         | 587(35.7)                                                   | 1.55(1.36-1.76) <sup>a**</sup> | 96(39.8)                             | 1.87(1.42-2.45) <sup>a**</sup> |
| high LDL-C                   | 98(36.0)                               | 0.64(0.49-0.84) <sup>a*</sup>  | 1405(44.1)                                                    | 1         | 931(56.8)                                                   | 1.47(1.30-1.67) <sup>a**</sup> | 140(58.1)                            | 1.52(1.16-2.00) <sup>a*</sup>  |
